# Supplementary material for: The sources and mechanisms of bioactive ingredients in coffee
Source: Royal Society of Chemistry journal article supplement (doi:10.1039/c9fo00288j), 2019-01-01
Supplement: c9fo00288j1.pdf [file c9fo00288j1.pdf]

### Supplementary Material

A

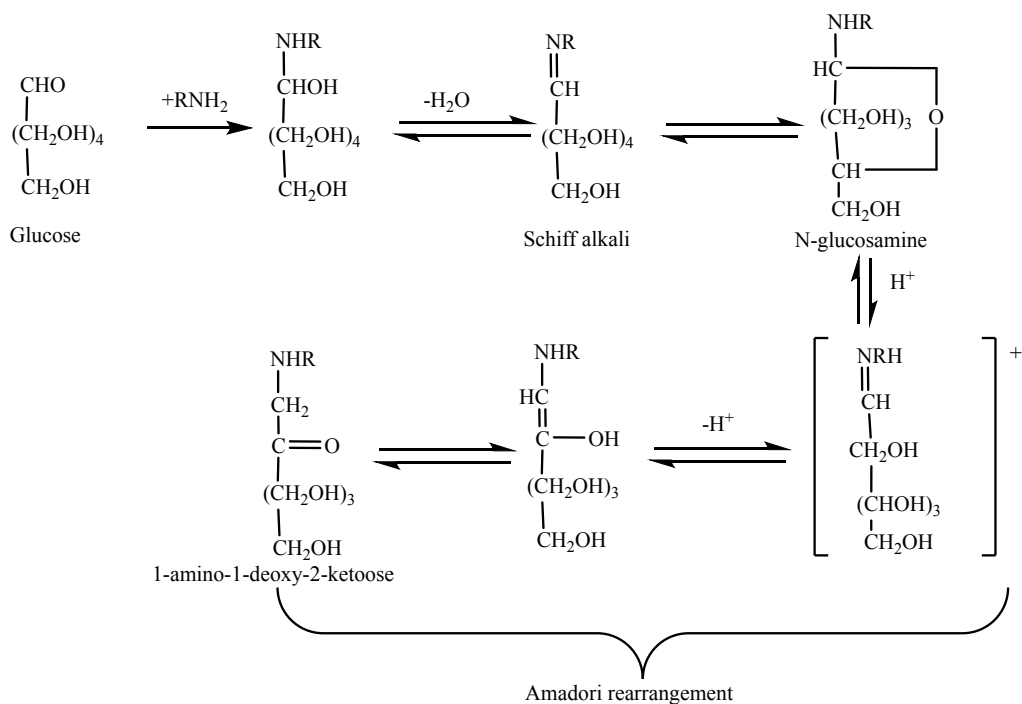

B

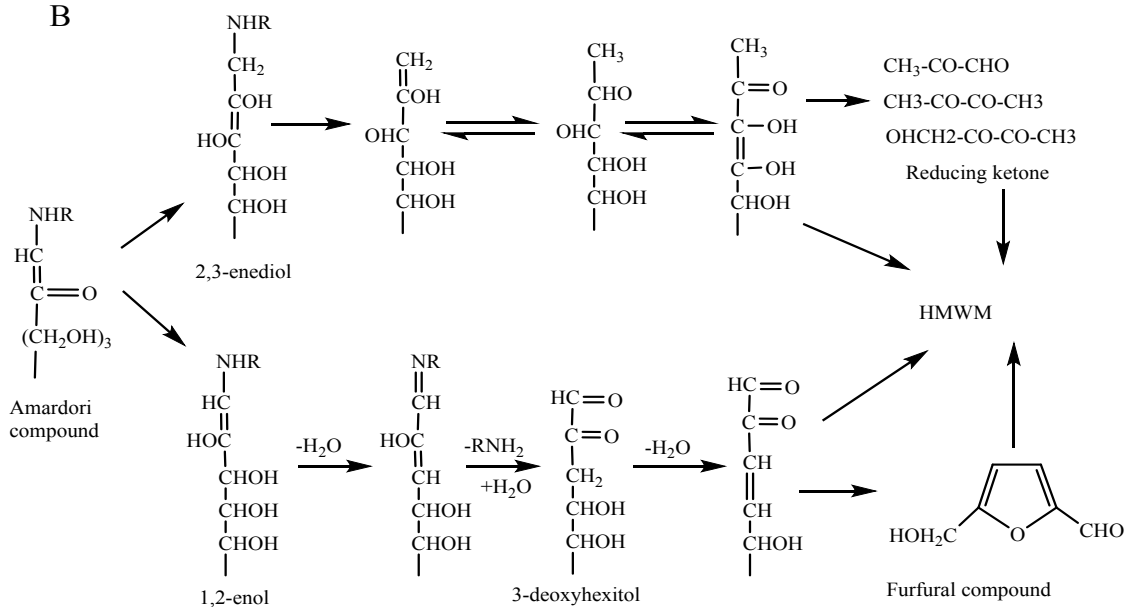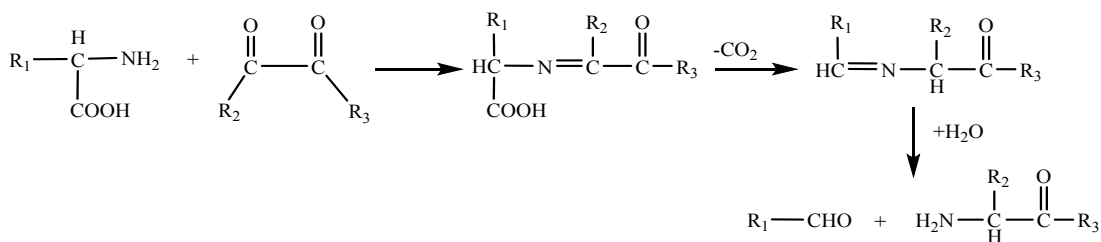

**Fig. S. 1** A) The early stage of Maillard reaction. The carbonyl group of the reducing sugar is reacted with an amino group and dehydrated to form a schiff base, which is converted into a reactive 1-amino-1-deoxy-2-ketose by Amadori rearrangement. B) The middle stage of Maillard reaction, which include three pathways: reducing ketone route, hexose route and Strecker degradation route.

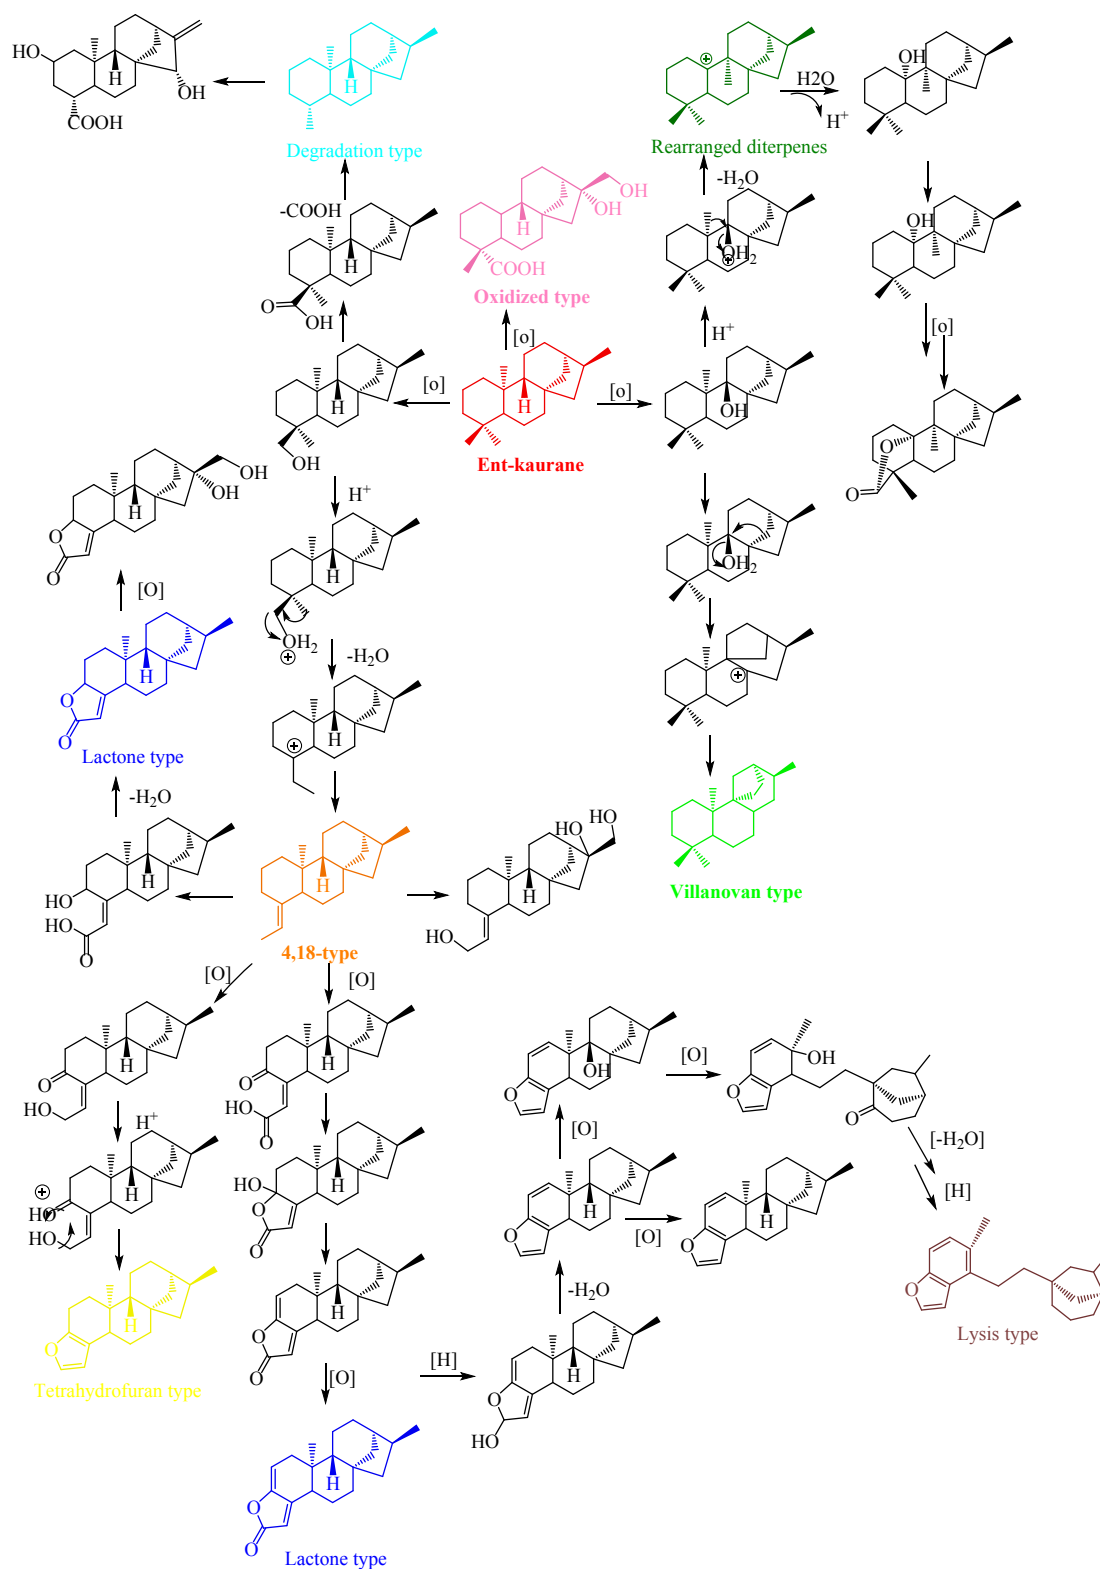

**Fig. S. 2** Possible biosynthetic pathways of eight types of diterpenes from coffee. All the coffee diterpenes are derived from the kauran skeleton via oxidation, condensation, rearrangement and other catalytic reactions.

**Table S. 1** Studies on the anti-cardiovascular diseases mechanisms of coffee ingredients.

| Ingredient         | Mechanism                                                                                                                        | Ref.   |
|--------------------|----------------------------------------------------------------------------------------------------------------------------------|--------|
| CGAs               | improve the bioavailability of NO                                                                                                | 1,2    |
| CGAs               | raise total homocysteine concentrations in plasma                                                                                | 3      |
| polyphenol         | enhance energy metabolism; reduces lipogenesis by downregulating SREBP-1c and related molecules.                                 | 4      |
| polyphenol         | improve postprandial hyperglycemia; vascular endothelial function                                                                | 5      |
| polyphenol         | elevate diastolic blood pressure and and hyperhomocysteinemia                                                                    | 6      |
| polyphenol         | enhance energy metabolism; reduces lipogenesis by downregulating SREBP-1c and related molecules.                                 | 4      |
| polyphenol         | improve postprandial hyperglycemia; vascular endothelial function                                                                | 5      |
| melanoidins        | inhibit angiotensin-I converting enzyme (ACE)                                                                                    | 7      |
| C/K                | increase the activity of cholesterol transfer proteins                                                                           | 8      |
| caffeine           | reduces flow mediated dilation (FMD) in the brachial artery                                                                      | 9      |
| caffeine           | improves flow-mediated dilatation                                                                                                | 10     |
| Coffee ingredients | reduce the serum levels of triacylglycerols                                                                                      | 11     |
| coffee ingredients | raise fasting plasma concentrations of total homocysteine in healthy individuals                                                 | 12, 13 |
| coffee ingredients | adipocytokines mainly explain the associations of coffee consumption with lipids and high sensitivity C-reactive protein(hs-CRP) | 14     |

**Table S. 2** Studies on the antibacterial activities of coffee ingredients.

| Compound                                                         | Strains                                                       | Result                                                                                                                                                          | Ref. |
|------------------------------------------------------------------|---------------------------------------------------------------|-----------------------------------------------------------------------------------------------------------------------------------------------------------------|------|
| 3',4'-dihydroxyacetophenone                                      |                                                               | The antimicrobial activity of the depends on the binding site of the hydroxyl group                                                                             | 15   |
| methylglyoxal; diacetyl and other $\alpha$ -dicarbonyl compounds | <i>Sa. aureus</i> and <i>St. mutans</i>                       | Caffeine may synergistically enhance the antibacterial activity of alpha-dicarbonyl compounds                                                                   | 16   |
| Kalata, CirA, CirB, and Cyclopsychotride                         | Gram-positive and Gram-negative                               | Kalata and CirA: MIC 0.2 $\mu$ M.<br>CirB to <i>E. coli</i> : MIC 0.41 $\mu$ M                                                                                  | 17   |
| CGA and dodecyl chloride (DCGA)                                  | Gram-positive and Gram-negative                               | CGA has inhibitory activity against <i>Pseudomonas fluorescens</i> and <i>Staphylococcus aureus</i> ;<br>DCGA is active against Gram-positive bacteria          | 18   |
| phenolic acids, caffeine, and melanoidins                        | Gram-positive                                                 | These compounds can inhibit Gram-positive bacteria such as <i>Staphylococcus aureus</i> , <i>Listeria monocytogenes</i> , and yeast ( <i>Candida albicans</i> ) | 19   |
| melanoidins                                                      | Gram-positive and Gram-negative                               | Three metal chelate-based antibacterial mechanisms are proposed                                                                                                 | 20   |
| polysaccharides                                                  | <i>Phoma violacea</i> and <i>Cladosporium cladosporioides</i> | The inhibition rates of these polysaccharides on <i>Phoma violacea</i> and <i>Cladosporium cladosporioides</i> were 41.27% and 54.60%                           | 21   |

**Table S. 3** Studies on the anti-diabetic mechanisms of coffee ingredients.

| Ingredient   | Mechanism                                                                                    | Ref. |
|--------------|----------------------------------------------------------------------------------------------|------|
| caffeine     | inhibits the misfolding of human amylin polypeptide (hIAPP)                                  | 22   |
| caffeine     | associates with higher adiponectin and lower inflammatory marker concentrations.             | 23   |
| CGAs and CA  | inhibit AChE activity in diabetic rats                                                       | 24   |
| CGAs         | increase the body's insulin response                                                         | 25   |
| svetol       | inhibits glucose-6-phosphatase hydrolysis in human liver microsomes                          | 26   |
| trigonelline | improves symptoms of diabetes in rats by regulating glucose and lipid metabolism key enzymes | 27   |
| trigonelline | improves auditory threshold changes and delay the latency of auditory evoked potentials      | 28   |
| trigonelline | improves diabetes-induced skeletal system diseases                                           | 29   |

**Table S. 4** Studies on the neuroprotection mechanisms of coffee ingredients.

| Ingredient | Mechanism                                                           | Ref. |
|------------|---------------------------------------------------------------------|------|
| caffeine   | blocks A2 adenosine receptors                                       | 30   |
| caffeine   | blocks adenosine A(1) and A(2A) receptors                           | 30   |
| caffeine   | reduces both brain and plasma A beta levels                         | 31   |
| caffeine   | enhances plasma granulocyte-colony stimulating factor (GCSF) levels | 32   |

|                                      |                                                                                                                                                                           |        |
|--------------------------------------|---------------------------------------------------------------------------------------------------------------------------------------------------------------------------|--------|
| coffee ingredients                   | counteract Th1-type cytokine mediated breakdown of interferon-gamma (IFN-gamma-) tryptophan                                                                               | 33     |
| cafestol                             | activates the cytoprotective transcription factor Nrf2                                                                                                                    | 34     |
| eicosanoyl-5-hydroxytryptamide (EHT) | ameliorates the phenotype of transgenic mice associated with decreased protein aggregation and phosphorylation, improved neuronal integrity and reduced neuroinflammation | 35     |
| eicosanoyl-5-hydroxytryptamide (EHT) | increases the phosphoprotein phosphatase 2A (PP2A) activity by inhibiting the demethylation of its catalytic subunit PP2A                                                 | 36, 37 |

**Table S. 5** Studies on the anticancer mechanisms of coffee ingredients.

| Ingredient | Mechanism                                                                                                                                | Ref. |
|------------|------------------------------------------------------------------------------------------------------------------------------------------|------|
| HMWM       | inhibit the activities of MMP-1, MMP-2 and MMP-9 to prevent colorectal cancer                                                            | 38   |
| CGAs       | induce selective killing of lung cancer cells                                                                                            | 41   |
| CGAs       | inhibit CT-26 colon cancer cell-induced lung metastasis by blocking the phosphorylation of extracellular regulatory protein kinase (ERK) | 39   |
| CGAs       | reduce DNA methylation by inhibiting DNA methyltransferases                                                                              | 40   |
| CGAs       | induce high levels of topoisomerase I and topoisomerase II-DNA complexes in cells                                                        | 41   |
| CGAs       | inhibit DNA methyltransferase 3a                                                                                                         | 42   |
| CGAs       | stimulate MCF-7 cell growth and that this effect is mediated through ER,                                                                 | 43   |
| kahweol    | induces apoptosis through activating transcription factor 3-mediated pathway in human colorectal                                         | 44   |

|                |                                                                                                                                                                                     |    |
|----------------|-------------------------------------------------------------------------------------------------------------------------------------------------------------------------------------|----|
|                | cancer cells.                                                                                                                                                                       |    |
| kahweol        | kahweol-mediated cyclin D1 degradation may contribute to the inhibition of the proliferation in human colorectal cancer cells.                                                      | 45 |
| kahweol        | inhibits metastasis through the disruption of STAT3-mediated transcription of the metalloproteinase                                                                                 | 46 |
| kahweol        | inhibits both COX-2 expression and MCP-1 secretion in endothelial cells                                                                                                             | 47 |
| kahweol        | down-regulation of Bcl-2 and c-FLIP contributes to the sensitizing effect of kahweol on TRAIL-mediated apoptosis in cancer cells                                                    | 48 |
| C&K            | increase overall glutathione transferase (Rakvaag & Dragsted) and GST classes alpha, mu, and enhance UDP-glucuronosyl transferase and GST-theta                                     | 49 |
| C&K            | Sp1 can be a novel molecular target of cafestol and kahweol in human Malignant pleural mesothelioma                                                                                 | 50 |
| C&K            | inhibit CYP450s by tendency but not universally                                                                                                                                     | 51 |
| C&K palmitates | convert rapid acetylators to a slow acetylator phenotype, accompanied by GST induction, might contribute to chemoprevention against cancers associated with heterocyclic amines     | 52 |
| C&K;<br>CGAs   | caffeine; induce phase II detoxifying and antioxidant enzymes; inhibit the expression or decrease the activity of phase I activating enzymes                                        | 53 |
| caffeic acid   | people with Fanconi Anemia, or healthy people who develop sporadic mutations in DNA repair protein Fanconi Anemia D2, may be hypersensitive to the carcinogenic activity of coffee. | 54 |
| caffeic acid   | targets MEK1 and TOPK to suppress colon cancer metastasis and neoplastic cell transformation                                                                                        | 39 |



|                      |                                                                                                                                               |    |
|----------------------|-----------------------------------------------------------------------------------------------------------------------------------------------|----|
| caffeic acid; CGAs   | inhibit in a concentration-dependent manner the DNA methylation catalyzed by prokaryotic M.SssI DNA methyltransferase (DNMT) and human DNMT1. | 40 |
| trigonelline         | increases the sensitivity of pancreatic cancer and colon cancer cell lines to anticancer drugs by inhibiting Nrf2 activity                    | 55 |
| trigonelline         | induces the proliferation of MCF-7 breast cancer cells                                                                                        | 43 |
| N-methylpyridinium   | reduces menadione-induced DNA damage in Caco-2 cells                                                                                          | 56 |
| N-caffeoyltryptophan | may be a potent Sirt1/2 inhibitor with potential use in anticancer                                                                            | 57 |
| coffee ingredients   | suppress the effect of the insulin-like growth factor receptor 1 (IGF1R) levels in breast cancer cells                                        | 58 |
| coffee ingredients   | reduce KRAS activity, thereby preventing the malignant growth of colon carcinoma cells                                                        | 59 |
| coffee ingredients   | inhibit BaP-induced production of oxidative stress by UDP-glucuronosyltransferases activation                                                 | 60 |
| coffee ingredients   | induce HT-29 cell apoptosis to prevent colon cancer                                                                                           | 61 |
| coffee ingredients   | inhibit adenocarcinoma SW480 growth (LC50-19%) dose dependently by decreasing glutathione/oxidized glutathione (GSH/GSSG) ratio               | 62 |
| coffee ingredients   | activate androgenic AKR1C3 expression mediated by Nrf2 in human prostate cancer cells and therefore may increase the risk of prostate cancer  | 63 |
| coffee ingredients   | inhibit TNF alpha-induced Nuclear Factor-kappa B activity and DNA-binding in prostate cancer cells                                            | 64 |

|                    |                                                                                                                                                                      |    |
|--------------------|----------------------------------------------------------------------------------------------------------------------------------------------------------------------|----|
| coffee ingredients | restore the catalase system in the liver, exerting its chemopreventive effects                                                                                       | 65 |
| coffee ingredients | the inverse association of coffee intake with cancer-hepatocellular carcinoma risk was partly accounted for by biomarkers of inflammation and hepatocellular injury. | 66 |
| coffee ingredients | prevents hepatitis and liver carcinogenesis by reducing the expression of inflammatory cytokines                                                                     | 67 |
| coffee ingredients | decrease systemic oxidative DNA damage through decreasing body iron storage in women.                                                                                | 68 |
| coffee ingredients | may reduce estrogen SULT activity, thereby enhancing estrogenic activity in the colon to prevent colon cancer                                                        | 69 |
| coffee ingredients | induce breast cancer resistance protein (BCRP) expression in the gastrointestinal tract and may affect the bioavailability of BCRP substrates                        | 70 |
| coffee ingredients | coffee-mediated stimulation of the Nrf2-ARE pathway resulting in increased endogenous defense mechanisms                                                             | 71 |
| coffee ingredients | cause induction of GSTs and protects against DNA-damage caused by (+/-)-anti-B[a]P-7,8-dihydrodiol-9,10-epoxide (BPDE)                                               | 72 |

---

## References

1. R. Ochiai, H. Jokura and T. Ogihara, Green coffee bean extract improves human vasoreactivity, *Hypertens. Res.*, 2004, **27**, 731-737.
2. A. Suzuki, A. Fujii and I. Saito, Improvement of hypertension and vascular dysfunction by hydroxyhydroquinone-free coffee in a genetic model of hypertension, *Febs Lett.*, 2016, **580**,

2317-2322.

3. M. R. Olthof, P. C. Hollman, P. L. Zock, and M. B. Katan, Consumption of high doses of chlorogenic acid, present in coffee, or of black tea increases plasma total homocysteine concentrations in humans, *Am. J. Clin. Nutr.*, 2001, **73**, 532-538.
4. T. Murase, K. Misawa, Y. Minegishi, M. Aoki, H. Ominami, Y. Suzuki and T. Hase, Coffee polyphenols suppress diet-induced body fat accumulation by downregulating SREBP-1c and related molecules in C57BL/6J mice, *Am. J. Physiol.-Endoc. M.*, 2011, **300**, E122-E133.
5. H. Jokura, I. Watanabe, M. Umeda, T. Hase and A. Shimotoyodome, Coffee polyphenol consumption improves postprandial hyperglycemia associated with impaired vascular endothelial function in healthy male adults, *Nutr. Res.*, 2015, **35**, 873-881.
6. A. M. Miranda, J. Steluti, R. M. Fisberg and D. M. Marchioni, Association between coffee consumption and its polyphenols with cardiovascular risk factors: A population-based study, *Nutrients*, 2017, **9**, 276.
7. J. A. Rufian-Henares and F. J. Morales, Effect of in vitro enzymatic digestion on antioxidant activity of coffee melanoidins and fractions, *J. Agr. Food Chem.*, 2009, **57**, 432-438.
8. A. H. M. Terpstra and M. B. Katan, The hypercholesterolemic effect of cafestol in coffee oil in gerbils and rats, *J. Nutri. Biochem.*, 2000, **11**, 311-317.
9. S. Buscemi, A. Mattina, M. R. Tranchina and S. Verga, Acute effects of coffee on QT interval in healthy subjects, *Nutr. J.*, 2011, **10**, 15.
10. E. A. J. Boon, K. D. Croft and N. C. Ward, The acute effect of coffee on endothelial function

and glucose metabolism following a glucose load in healthy human volunteers, *Food & Funct.*, 2017, **8**, 3366-3373.

11. L. F. Brito, L. D. de Queiros, M. D. G. Peluzio, S. M. R. Ribeiro and J. H. Queiroz, Effect of dry coffee residues fermented with *monascus ruber* on the metabolism of apo E mice, *Arq. Bras. Cardiol.*, 2012, **99**, 747-753.
12. M. J. Grubben, G. H. Boers, H. J. Blom and M. B. Katan, Unfiltered coffee increases plasma homocysteine concentrations in healthy volunteers: a randomized trial, *Am. J. Clin. Nutr.*, 2000, **71**, 480-484.
13. R. Urgert, T. van Vlie, P. L. Zock and M. B. Katan, Heavy coffee consumption and plasma homocysteine: a randomized controlled trial in healthy volunteers, *Am. J. Clin. Nutr.*, 2000, **72**, 1107-1110.
14. K. Yamashita, H. Yatsuya, T. Muramatsu and K. Tamakoshi, Association of coffee consumption with serum adiponectin, leptin, inflammation and metabolic markers in Japanese workers: a cross-sectional study, *Nutr. Diabetes*, 2012, **2**, e33-e33.
15. A. Nishina, F. Kajishima, M. Matsunaga and T. Osawa, Antimicrobial substance, 3',4'-Dihydroxyacetophenone, in coffee residue, *Biosci. Biotech. Biochem.*, 1994, **58**, 293-296.
16. M. Daglia, A. Papetti, P. Grisoli, C. Aceti and G. Gazzani, Isolation, identification, and quantification of roasted coffee antibacterial compounds, *J. Agr. Food Chem.*, 2007, **55**, 10208-10213.
17. J. P. Tam, Y. A. Lu, J. L. Yang and K. W. Chiu, An unusual structural motif of antimicrobial

peptides containing end-to-end macrocycle and cystine-knot disulfides, *P. Natl. Acad. Sci. USA*, 1999, **96**, 8913-8918.

18. M. L. Suarez-Quiroz, W. Taillefer, E. M. L. Mendez, O. Gonzalez-Rios and M. C. Figueroa-Espinoza, Antibacterial activity and antifungal and anti-aycotoxigenic activities against *aspergillus alavus* and *A. Achraceus* of green coffee chlorogenic acids and dodecyl chlorogenates, *J. Food Safety*, 2013, **33**, 360-368.
19. C. Monente, J. Bravo, A. I. Vitas, L. Arbillaga, M. P. De Pena and C. Cid, Coffee and spent coffee extracts protect against cell mutagens and inhibit growth of food-borne pathogen microorganisms, *J. Func. Foods*, 2015, **12**, 365-374.
20. J. A. Rufian-Henares and S. P. de la Cueva, Antimicrobial activity of coffee melanoidins-A study of their metal-chelating properties, *J. Agr. Food Chem.*, 2009, **57**, 432-438.
21. L. F. Ballesteros, M. A. Cerqueira, J. A. Teixeira and S. I. Mussatto, Characterization of polysaccharides extracted from spent coffee grounds by alkali pretreatment, *Carbohydr. Polym.*, 2015, **127**, 347-354.
22. B. A. Cheng, X. R. Liu, H. Gong, L. Q. Huang and K. Huan, Coffee components inhibit amyloid formation of human islet amyloid polypeptide in vitro: possible link between coffee consumption and diabetes mellitus, *J. Agr. Food Chem.*, 2011, **59**, 13147-13155.
23. C. J. Williams, J. L. Fargnoli, J. J. Hwang and C. S. Mantzoros, Coffee consumption is associated with higher plasma adiponectin concentrations in women with or without type 2 diabetes - A prospective cohort study, *Diabetes Care*, 2008, **31**, 504-507.

24. N. Stefanello, R. Schmatz, L. B. Pereira, M. A. Rubin, J. B. T. da Rocha and M. R. C. Schetinger, Effects of chlorogenic acid, caffeine, and coffee on behavioral and biochemical parameters of diabetic rats, *Mol. Cell. Biochem.*, 2014, **388**, 277-286.
25. B. Fernandez-Gomez, A. Lezama, M. Amigo-Benavent and del M. D. Castillo, Insights on the health benefits of the bioactive compounds of coffee silverskin extract, *J. Func. Foods*, 2016, **25**, 197-207.
26. C. Henry-Vitrac, A. Ibarra, M. Roller and X. Vitrac, Contribution of chlorogenic acids to the Inhibition of human hepatic glucose-6-phosphatase activity in vitro by svetol, a standardized decaffeinated green coffee extract, *J. Agr. Food Chem.*, 2010, **58**, 4141-4144.
27. O. Yoshinari, H. Sato, and K. Igarashi, Anti-diabetic effects of pumpkin and its components, trigonelline and nicotinic acid, on Goto-Kakizaki rats, *Biosci. Biotechnol. Biochem.*, 2009, **73**, 1033-1041.
28. B. N. Hong, T. H. Yi, R. Park and T. H. Kang, Coffee improves auditory neuropathy in diabetic mice, *Neurosci. Lett.*, 2008, **441**, 302-306.
29. J. Folwarczna, A. Janas, M. Pytlik and M. Gajdos, Effects of trigonelline, an alkaloid present in coffee, on diabetes-induced disorders in the rat skeletal system, *Nutrients*, 2016, **8**, 133.
30. J. Trevitt, K. Kawa, A. Jalali and C. Larsen, Differential effects of adenosine antagonists in two models of parkinsonian tremor. *Pharmacol. Biochem. Behav.*, 2009, **94**, 24-29.
31. G. W. Arendash and C. H. Cao, Caffeine and coffee as therapeutics against alzheimer's disease, *J. Alzheimers Dis.*, 2010, **20**, S117-S126.

32. C. H. Cao, L. Wang, X. Y. Lin, M. Mamcarz and G. Arendash, Caffeine synergizes with another coffee component to increase plasma GCSF: Linkage to cognitive benefits in alzheimer's mice, *J. Alzheimers Dis.*, 2011, **25**, 323-335.
33. J. M. Gostner, S. Schroecksnadel, M. Jenny, A. Klein and D. Fuchs, Coffee extracts suppress tryptophan breakdown in mitogen-stimulated peripheral blood mononuclear cells, *J. Am. Coll. Nutr.*, 2015, **34**, 212-223.
34. K. Trinh, L. Andrews, J. Krause, T. Hanak and L. Pallanck, Decaffeinated coffee and nicotine-free tobacco provide neuroprotection in drosophila models of parkinson's disease through an NRF2-dependent mechanism, *J. Neurosci.*, 2010, **30**, 5525-5532.
35. K. W. Lee, J. Y. Im, J. M. Woo and M. M. Mouradian, Neuroprotective and anti-inflammatory properties of a coffee component in the MPTP model of parkinson's disease, *Neurotherapeutics*, 2013, **10**, 143-153.
36. G. Basurto-Islas, J. Blanchard, Y. C. Tung and K. Iqbal, Therapeutic benefits of a component of coffee in a rat model of Alzheimer's disease, *Neurobiol. Aging*, 2014, **35**, 2701-2712.
37. K. Asam, A. Staniszewski, H. Zhang and R. E. Nicholls, Eicosanoyl-5-hydroxytryptamide (EHT) prevents Alzheimer's disease-related cognitive and electrophysiological impairments in mice exposed to elevated concentrations of oligomeric beta-amyloid, *Plos One*, 2017, **12**, e0189413.
38. L. M. De Marco, S. Fischer and T. Henle, High molecular weight coffee melanoidins are inhibitors for matrix metalloproteases, *J. Agr. Food Chem.*, 2011, **59**, 11417-11423.

39. N. J. Kang, K. W. Lee, B. H. Kim and Z. Dong, Coffee phenolic phytochemicals suppress colon cancer metastasis by targeting MEK and TOPK, *Carcinogenesis*, 2011, **32**, 921-928.
40. W. J. Lee and B. T. Zhu, Inhibition of DNA methylation by caffeic acid and chlorogenic acid, two common catechol-containing coffee polyphenols, *Carcinogenesis*, 2006, **27**, 269-277.
41. E. Burgos-Moron, J. M. Calderon-Montano, M. L. Orta, N. Pastor and M. Lopez-Lazaro, The coffee constituent chlorogenic acid Induces cellular DNA damage and formation of topoisomerase I- and II-DNA complexes in cells, *J. Agr. Food Chem.*, 2012, **60**, 7384-7391.
42. A. Rajavelu, Z. Tulyasheva, R. Jaiswal and N. Kuhnert, The inhibition of the mammalian DNA methyltransferase 3a (Dnmt3a) by dietary black tea and coffee polyphenols, *Bmc Biochem.*, 2011, **12**, 16.
43. K. F. Allred, K. M. Yackley, J. Vanamala and C. D. Allred, Trigonelline is a novel phytoestrogen in coffee beans, *J. Nutr.*, 2009, **139**, 1833-1838.
44. G. H. Park, H. M. Song and J. B. Jeong, Kahweol from coffee induces apoptosis by upregulating activating transcription factor 3 in human colorectal cancer cells, *Biomol. Ther.*, 2017, **25**, 337-343.
45. G. H. Park, H. M. Song and J. B. Jeong, The coffee diterpene kahweol suppresses the cell proliferation by inducing cyclin D1 proteasomal degradation via ERK1/2, JNK and GSK3 beta-dependent threonine-286 phosphorylation in human colorectal cancer cells, *Food Chem. Toxicol.*, 2016, **95**, 142-148.
46. H. G. Kim, Y. P. Hwang, E. H. Han and H. G. Jeong, The coffee diterpene kahweol inhibits



metastasis by modulating expressions of MMPs and VEGF via STAT3 inactivation, *Food Chem.*, 2012, **133**, 1521-1529.

47. C. Cardenas, A. R. Quesada and M. A. Medina, Anti-Angiogenic and anti-inflammatory properties of kahweol, a coffee diterpene, *Plos One*, 2011, **6**. e23407.
48. H. J. Um, J. H. Oh, Y. N. Kim, Y. H. Choi and T. K. Kwon, The coffee diterpene kahweol sensitizes TRAIL-induced apoptosis in renal carcinoma Caki cells through down-regulation of Bcl-2 and c-FLIP, *Chem.-Biol. Interact.*, 2010, **186**, 36-42.
49. W. W. Huber, S. Prustomersky, E. Delbanco and R. Schulte-Hermann, Enhancement of the chemoprotective enzymes glucuronosyl transferase and glutathione transferase in specific organs of the rat by the coffee components kahweol and cafestol, *Arch. Toxicol.*, 2002, **76**, 209-217.
50. K. A. Lee, J. I. Chae and J. H. Shim, Natural diterpenes from coffee, cafestol and kahweol induce apoptosis through regulation of specificity protein 1 expression in human malignant pleural mesothelioma, *J. Biomed. Sci.*, 2012, **19**, 60.
51. W. W. Huber, W. Rossmannith, M. Grusch and R. Schulte-Hermann, Effects of coffee and its chemopreventive components kahweol and cafestol on cytochrome P450 and sulfotransferase in rat liver, *Food Chem. Toxicol.*, 2008, **46**, 1230-1238.
52. W. W. Huber, C. H. Teitel, B. F. Coles and F. F. Kadlubar, Potential chemoprotective effects of the coffee components kahweol and cafestol palmitates via modification of hepatic N-acetyltransferase and glutathione S-transferase activities, *Environ. Mol. Mutagen.*, 2004, **44**,

265-276.

53. K. S. Tao, W. Wang, L. Wang, D. Y. Cao, Y. Q. Li and K. F. Dou, The multifaceted mechanisms for coffee's anti-tumorigenic effect on liver, *Med. Hypotheses*, 2008, **71**, 730-736.
54. E. Burgos-Moron, J. M. Calderon-Montano, M. L. Orta, E. Guillen-Mancina and M. Lopez-Lazaro, Cells deficient in the fanconi anemia protein FANCD2 are hypersensitive to the cytotoxicity and DNA damage induced by coffee and caffeic acid, *Toxins*, 2016, **8**, 211.
55. A. Arlt, S. Sebens, S. Krebs, C. Geismann and H. Schafer, Inhibition of the Nrf2 transcription factor by the alkaloid trigonelline renders pancreatic cancer cells more susceptible to apoptosis through decreased proteasomal gene expression and proteasome activity, *Oncogene*, 2013, **32**, 4825-4835.
56. T. Bakuradze, R. Lang, T. Hofmann, H. Stiebitz and C. Janzowski, Antioxidant effectiveness of coffee extracts and selected constituents in cell-free systems and human colon cell lines, *Mol. Nutr. Food Res.*, 2010, **54**, 1734-1743.
57. J. B. Park, Finding potent sirt inhibitor in coffee: Isolation, confirmation and synthesis of javamide-II (N-Caffeoyltryptophan) as sirt1/2 inhibitor, *Plos One*, 2016, **11**, e0150392.
58. S. Bjorner, A. H. Rosendahl, H. Tryggvadottir, M. Simonsson and H. Jernstrom, Coffee is associated with lower breast tumor insulin-like growth factor receptor 1 levels in normal-weight patients and improved prognosis following tamoxifen or radiotherapy treatment, *Front. Endocrinol.*, 2018, **9**.

59. T. Nakayama, M. Funakoshi-Tago and H. Tamura, Coffee reduces KRAS expression in Caco-2 human colon carcinoma cells via regulation of miRNAs, *Oncol. Lett.*, 2017, **14**, 1109-1114.
60. S. Kalthoff, S. Landerer, J. Reich and C. P. Strassburg, Protective effects of coffee against oxidative stress induced by the tobacco carcinogen benzo[alpha]pyrene, *Free Radical Bio. Med.*, 2017, **108**, 66-76.
61. A. M. Hernandez-Arriaga, B. D. Oomah and R. Campos-Vega, Microbiota source impact in vitro metabolite colonic production and anti-proliferative effect of spent coffee grounds on human colon cancer cells (HT-29), *Food Res. Int.*, 2017, **97**, 191-198.
62. N. Garcia-Gutierrez, M. E. Maldonado-Celis, M. Rojas-Lopez, G. F. Loarca-Pina and R. Campos-Vega, The fermented non-digestible fraction of spent coffee grounds induces apoptosis in human colon cancer cells (SW480), *J. Func. Foods*, 2017, **30**, 237-246.
63. K. Takahashi, M. Funakoshi-Tago, M. Takaoka, S. Kakio and H. Tamura, Roasted coffee induction of aldo-keto reductase 1C3 expression in LNCaP human prostate cancer cells is associated with Nrf2 activation, *Oncol. Lett.*, 2016, **12**, 5321-5326.
64. M. Kolberg, S. Pedersen, M. Mitake, K. L. Holm and I. Paur, Coffee inhibits nuclear factor-kappa B in prostate cancer cells and xenografts, *J. Nutr. Biochem.*, 2016, **27**, 153-163.
65. C. S. de Magalhaes, J. E. Takarada, N. C. Carvalho, D. D. Carvalho, F. L. de Andrade, E. B. Ferreira, P. O. Luccas and L. Azevedo, The coffee protective effect on catalase system in the preneoplastic induced rat liver, *J. Chem.*, 2016, 1-9.
66. K. Aleksandrova, C. Bamia, D. Drogan and P. Lagiou, The association of coffee intake with

liver cancer risk is mediated by biomarkers of inflammation and hepatocellular injury: data from the European Prospective Investigation into Cancer and Nutrition, *Am. J. Clin. Nutr.*, 2015, **102**, 1498-1508.

67. M. Katayama, K. Donai, H. Sakakibara, Y. Ohtomo and T. Fukuda, Coffee consumption delays the hepatitis and suppresses the inflammation related gene expression in the Long-Evans Cinnamon rat, *Clin. Nutr.*, 2014, **33**, 302-310.
68. A. Hori, H. Kasai, K. Kawai and T. Mizoue, Coffee intake is associated with lower levels of oxidative DNA damage and decreasing body iron storage in healthy women, *Nutr. Cancer*, 2014, **66**, 964-969.
69. M. Isshiki, H. Ohta and H. Tamura, Coffee reduces SULT1E1 expression in human colon carcinoma Caco-2 Cells, *Biol. Pharm. Bull.*, 2013, **36**, 299-304.
70. M. Isshiki, K. Umezawa and H. Tamura, Coffee induces breast cancer resistance protein expression in Caco-2 cells, *Biol. Pharm. Bull.*, 2011, **34**, 1624-1627.
71. C. Cavin, M. Marin-Kuan, S. Langouet, C. Bezencon and B. Schilter, Induction of Nrf2-mediated cellular defenses and alteration of phase I activities as mechanisms of chemoprotective effects of coffee in the liver, *Food Chem. Toxicol.*, 2008, **46**, 1239-1248.
72. H. Steinkellner, C. Hoelzl, M. Uhl, C. Cavin and S. Knasmuller, Coffee consumption induces GSTP in plasma and protects lymphocytes against (+/-)-anti-benzo[a]pyrene-7,8-dihydrodiol-9,10-epoxide induced DNA-damage: Results of controlled human intervention trials, *Mutat. Res.-Fund. Mol. M.*, 2005, **591**, 264-275.
